# Supplementary material
Source: PubMed Central journal article supplement (PMC2836677)
Supplement: 0911042107_pnas.200911042SI.pdf [file 0911042107_pnas.200911042SI.pdf]

# Supporting Information

Rosenblum et al. 10.1073/pnas.0911042107

**Table S1. Number of *Mc1r* alleles sampled from dark soil and white sands habitats for the three focal species**

| Species and habitat          | Number of wild-type alleles | Number of derived alleles |
|------------------------------|-----------------------------|---------------------------|
| <i>Sceloporus undulatus</i>  |                             |                           |
| Dark soil                    | 58                          | 0                         |
| White sands                  | 30                          | 26                        |
| FET $P = 2 \times 10^{-10}$  |                             |                           |
| <i>Aspidoscelis inornata</i> |                             |                           |
| Dark soil                    | 41                          | 3*                        |
| White sands                  | 8                           | 48                        |
| FET $P = 7 \times 10^{-15}$  |                             |                           |
| <i>Holbrookia maculata</i>   |                             |                           |
| Dark soil                    | 52                          | 0                         |
| White sands                  | 0                           | 36                        |
| FET $P = 3 \times 10^{-16}$  |                             |                           |

Derived alleles are those with the His<sup>208</sup>Tyr substitution for *Sceloporus undulatus*, the Thr<sup>170</sup>Ile substitution for *Aspidoscelis inornata*, and the Val<sup>168</sup>Ile substitution for *Holbrookia maculata*. Fisher's Exact Test (FET) was highly significant for each species. \*Note that derived alleles in dark soil *A. inornata* were always found in the heterozygous state.

**Table S2. Functional characterization of *Mc1r* variants**

| Species                      | Phenotype | Amino acid difference wild-type vs. derived | cAMP accumulation               |                       | Expression                   |                           |                   |
|------------------------------|-----------|---------------------------------------------|---------------------------------|-----------------------|------------------------------|---------------------------|-------------------|
|                              |           |                                             | Basal cAMP<br>(Fold over basal) | $E_{max}$             | EC <sub>50</sub><br>(pmol/L) | Total<br>(% dark variant) | Cell surface      |
| <i>Sceloporus undulatus</i>  | Dark      | His <sup>208</sup> Tyr TMD5                 | 4.7 ± 1.3 (7)                   | 29.9 ± 9.7 (7)        | 296 ± 107 (7)                | 100 (3)                   | 100 (5)           |
|                              | Blanched  |                                             | <b>1.5 ± 0.1 (7)</b>            | 22.8 ± 4.5 (7)        | 706 ± 300 (7)                | 101 ± 6 (3)               | <b>80 ± 2 (5)</b> |
| <i>Aspidoscelis inornata</i> | Dark      | Thr <sup>170</sup> Ile TMD4                 | 21.3 ± 4.8 (6)                  | 59.9 ± 15.8 (6)       | 752 ± 187 (6)                | 100 (3)                   | 100 (3)           |
|                              | Blanched  |                                             | <b>8.1 ± 1.9 (6)</b>            | <b>22.6 ± 4.2 (6)</b> | 674 ± 360 (6)                | 100 ± 5 (3)               | 107 ± 3 (3)       |
| <i>Holbrookia maculata</i>   | Dark      | Val <sup>168</sup> Ile TMD4                 | 8.9 ± 2.1 (6)                   | 39.4 ± 10.1 (6)       | 1272 ± 955 (6)               | 100 (3)                   | 100 (6)           |
|                              | Blanched  |                                             | <b>8.3 ± 1.9 (6)</b>            | 38.8 ± 9.5 (6)        | 534 ± 208 (6)                | 100 ± 5 (3)               | 103 ± 2 (6)       |

For cAMP accumulation assay, COS-7 cells were transfected with expression vectors coding for all variants listed. We measured basal cAMP,  $E_{max}$ , and EC<sub>50</sub> values from concentration–response curves (1 fM–10 μM) of the natural agonist α-MSH. Basal cAMP and  $E_{max}$  values are given as x-fold over basal cAMP accumulation of control-transfected cells (basal cAMP in assays from different species: *Sceloporus undulatus*, 48 ± 44 amol/cell; *Aspidoscelis inornata*, 4 ± 1 amol/cell; *Holbrookia maculata*, 56 ± 51 amol/cell). Data are presented as means ± SEM of independent experiments (number indicated in parentheses), each carried out at least in duplicate. Numbers in bold indicate a significant mean value difference between wild-type and derived variant of the respective species ( $P < 0.05$ ; two-tailed, paired Student *t* test). For expression analyses in ELISA studies, COS-7 cells were transfected, total cellular expression levels (intracellular plus plasma membrane expression) were measured by a sandwich ELISA, and cell-surface expression levels (plasma membrane expression) were measured by an indirect cellular ELISA. Specific optical density (OD) readings (OD value of HA-tagged construct minus OD value of control-transfected cells) are given as a percentage of the wild-type allele from the respective species. For the total expression ELISA, the nonspecific OD<sub>492 nm</sub> values of control (GFP)-transfected COS-7 cells were 0.127 ± 0.007 (set 0%), and the specific OD<sub>492 nm</sub> values of the wild-type *Mc1r* alleles were *Sceloporus undulatus*, 0.941 ± 0.014; *Aspidoscelis inornata*, 0.954 ± 0.058; *Holbrookia maculata*, 0.954 ± 0.015 (set 100% for the respective species). For cell-surface expression ELISA, the nonspecific OD<sub>492 nm</sub> values of control-transfected COS-7 cells were *Sceloporus undulatus*, 0.037 ± 0.007; *Aspidoscelis inornata*, 0.038 ± 0.012; *Holbrookia maculata*, 0.036 ± 0.006 (set 0% for the respective species), and the specific OD<sub>492 nm</sub> values of the wild-type *Mc1r* alleles were *Sceloporus undulatus*, 0.996 ± 0.080; *Aspidoscelis inornata*, 0.703 ± 0.017; *Holbrookia maculata*, 1.105 ± 0.0875 (set 100% for the respective species). Data are presented as means ± SEM of independent experiments (number indicated in parentheses), each carried out in triplicate. Numbers in bold indicate a significant mean value difference between wild-type and derived variant of the respective species ( $P < 0.05$ ; two-tailed, paired Student *t* test).

**Table S3. Samples of *Sceloporus undulatus* and *Aspidoscelis inornata* used for the Fig. 3 comparison between *Mc1r* genotype (determined by sequencing) and color phenotype (determined by spectrophotometer)**

| Specimen catalog no.         | Habitat type | AUC    |
|------------------------------|--------------|--------|
| <i>Sceloporus undulatus</i>  |              |        |
| MVZ 252867                   | Dark soil    | 4,181  |
| MVZ 252868                   | Dark soil    | 3,582  |
| MVZ 252869                   | Dark soil    | 4,214  |
| MVZ 252870                   | Dark soil    | 4,147  |
| MVZ 252871                   | Dark soil    | 3,855  |
| MVZ 252872                   | Dark soil    | 5,217  |
| MVZ 252873                   | Dark soil    | 4,290  |
| MVZ 252874                   | Dark soil    | 3,918  |
| MVZ 252875                   | Dark soil    | 5,313  |
| MVZ 252876                   | Dark soil    | 4,917  |
| MVZ 252877                   | Dark soil    | 3,175  |
| MVZ 252937                   | Dark soil    | 3,453  |
| MVZ 252941                   | Dark soil    | 4,359  |
| MVZ 253020                   | Dark soil    | 3,705  |
| MVZ 253021                   | Dark soil    | 4,414  |
| MVZ 253023                   | Dark soil    | 2,296  |
| MVZ 253025                   | Dark soil    | 4,073  |
| MVZ 253026                   | Dark soil    | 3,604  |
| MVZ 253028                   | Dark soil    | 2,136  |
| MVZ 253029                   | Dark soil    | 2,776  |
| MVZ 253030                   | Dark soil    | 2,814  |
| MVZ 252957                   | Ecotone      | 7,791  |
| MVZ 252961                   | Ecotone      | 6,740  |
| MVZ 252962                   | Ecotone      | 8,694  |
| MVZ 252968                   | Ecotone      | 5,514  |
| MVZ 252973                   | Ecotone      | 6,482  |
| MVZ 252975                   | Ecotone      | 5,215  |
| MVZ 252976                   | Ecotone      | 7,078  |
| MVZ 252978                   | Ecotone      | 7,270  |
| MVZ 252979                   | Ecotone      | 8,238  |
| MVZ 252984                   | Ecotone      | 9,845  |
| MVZ 252986                   | Ecotone      | 6,293  |
| MVZ 252994                   | Ecotone      | 6,152  |
| MVZ 253007                   | Ecotone      | 6,923  |
| MVZ 253016                   | Ecotone      | 6,048  |
| MVZ 252939                   | White sands  | 6,867  |
| MVZ 252940                   | White sands  | 9,200  |
| MVZ 252946                   | White sands  | 11,023 |
| MVZ 252949                   | White sands  | 10,037 |
| MVZ 252951                   | White sands  | 7,962  |
| MVZ 252952                   | White sands  | 8,965  |
| MVZ 252966                   | White sands  | 6,571  |
| MVZ 252989                   | White sands  | 10,173 |
| MVZ 252991                   | White sands  | 7,977  |
| MVZ 252998                   | White sands  | 5,770  |
| MVZ 252999                   | White sands  | 6,854  |
| MVZ 253000                   | White sands  | 9,314  |
| MVZ 253001                   | White sands  | 6,083  |
| MVZ 253004                   | White sands  | 6,496  |
| MVZ 253008                   | White sands  | 4,110  |
| MVZ 253014                   | White sands  | 5,928  |
| EBR 492                      | White sands  | 6,629  |
| <i>Aspidoscelis inornata</i> |              |        |
| MVZ 252632                   | Dark soil    | 4,705  |
| MVZ 252633                   | Dark soil    | 4,141  |
| MVZ 252634                   | Dark soil    | 4,911  |
| MVZ 252635                   | Dark soil    | 2,655  |
| MVZ 252636                   | Dark soil    | 4,755  |
| MVZ 252637                   | Dark soil    | 3,347  |

**Table S3. (Cont.)**

| Specimen catalog no. | Habitat type | AUC   |
|----------------------|--------------|-------|
| MVZ 252638           | Dark soil    | 4,138 |
| MVZ 252639           | Dark soil    | 4,022 |
| MVZ 252640           | Dark soil    | 3,220 |
| MVZ 252642           | Dark soil    | 3,902 |
| MVZ 252698           | Dark soil    | 4,552 |
| MVZ 252699           | Dark soil    | 4,331 |
| MVZ 252667           | Ecotone      | 4,112 |
| MVZ 252671           | Ecotone      | 5,896 |
| MVZ 252673           | Ecotone      | 4,836 |
| MVZ 252674           | Ecotone      | 6,408 |
| MVZ 252675           | Ecotone      | 6,375 |
| MVZ 252676           | Ecotone      | 5,938 |
| MVZ 252677           | Ecotone      | 7,028 |
| MVZ 252679           | Ecotone      | 4,969 |
| MVZ 252680           | Ecotone      | 4,978 |
| MVZ 252688           | Ecotone      | 8,027 |
| MVZ 252690           | Ecotone      | 5,503 |
| MVZ 252691           | Ecotone      | 5,339 |
| MVZ 252694           | Ecotone      | 4,854 |
| MVZ 252695           | Ecotone      | 3,242 |
| MVZ 252696           | Ecotone      | 3,433 |
| MVZ 252670           | White sands  | 9,803 |
| MVZ 252672           | White sands  | 7,615 |
| MVZ 252682           | White sands  | 7,235 |
| MVZ 252683           | White sands  | 8,862 |
| MVZ 252684           | White sands  | 7,200 |
| MVZ 252685           | White sands  | 9,170 |
| MVZ 252686           | White sands  | 9,359 |
| MVZ 252687           | White sands  | 8,462 |
| MVZ 252689           | White sands  | 8,435 |
| MVZ 252692           | White sands  | 7,956 |
| MVZ 252693           | White sands  | 5,114 |
| EBR 339              | White sands  | 8,267 |

MVZ specimen ID numbers refer to accession numbers at the Museum of Vertebrate Zoology, University of California, Berkeley. EBR specimen ID numbers reference samples housed at the University of Idaho. AUC, area under the spectral curve for the visible spectrum (400–700 nm).
